# Supplementary material for: The dynamical behavior of hydrated glutathione: a model for protein–water interactions
Source: Royal Society of Chemistry journal article supplement (doi:10.1039/c003493b), 2010-01-01
Supplement: c003493b.pdf [file c003493b.pdf]

# SUPPLEMENTARY MATERIAL

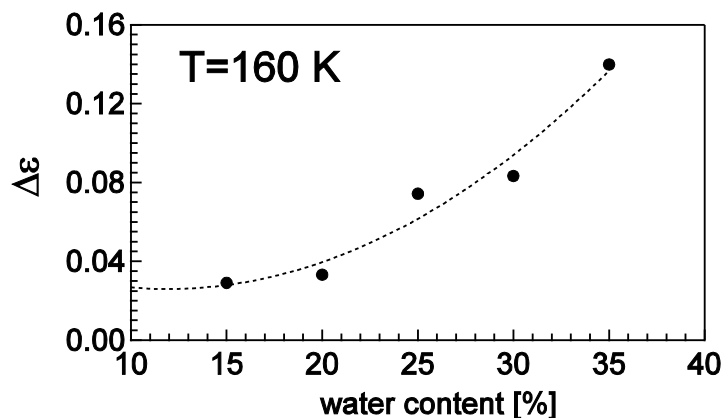

Fig.1: dielectric strength of process I as a function of water content at a fixed, sub  $T_g$ , temperature. The dashed line is a guide for eyes.

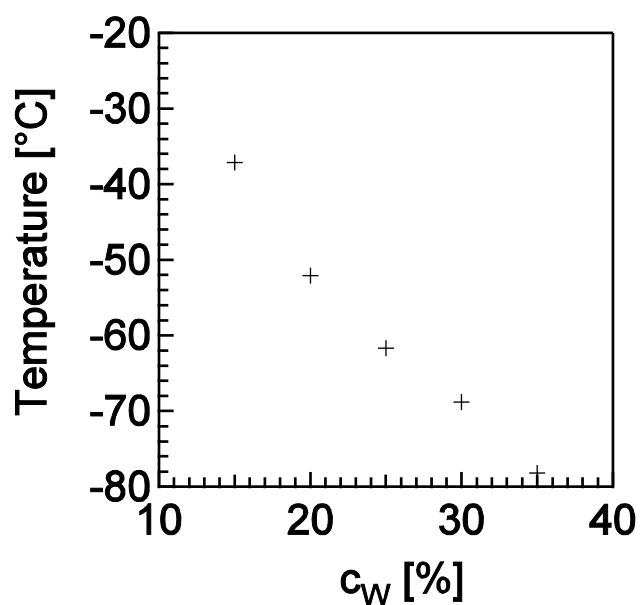

Fig.2: calorimetric glass transition temperatures as a function of water content. From the heat flow/temperature curves,  $T_g$  values were calculated as the onset point of a step-like change in the curve, during the heating cycle.
